# Supplementary material for: Analysis of an Inactive Cyanobactin Biosynthetic Gene Cluster Leads to Discovery of New Natural Products from Strains of the Genus Microcystis
Source: PubMed Central journal article supplement (PMC3428304; doi:10.1371/journal.pone.0043002), 2012-08-27

**Figure S1.** MS and MS<sup>2</sup> spectra of native and derivatized peptides from *M. aeruginosa* strains as denoted in the figure. MS<sup>2</sup> spectra of prenylated piricyclamide ILGEGEGWNYNP (A), geranylated piricyclamide MSGVDYYPN (B), piricyclamide TFCDLATKQCYP (D), piricyclamide WILLADGTRPKNAP (E), piricyclamide FAIFLLLP and <sup>15</sup>N-labelled FAIFLLLP (F), <sup>15</sup>N-labelled piricyclamide ILGEGEGWNYNP (G), piricyclamide TLGCMNGTERCLGLP and carboxyamidomethylated TLGCMNGTERCLGLP (H), <sup>15</sup>N-labelled piricyclamide NEFMQTGSYSGP (I), <sup>15</sup>N-labelled piricyclamide MSGVDYYPN (J), piricyclamide SQWGWRLSDP and <sup>15</sup>N-labelled SQWGWRLSDP (K), piricyclamide, GTHLYTITP and <sup>15</sup>N-labelled GTHLYTITP (L) and MS spectrum of geranylated piricyclamide NEFMQTGSYSGP (C).

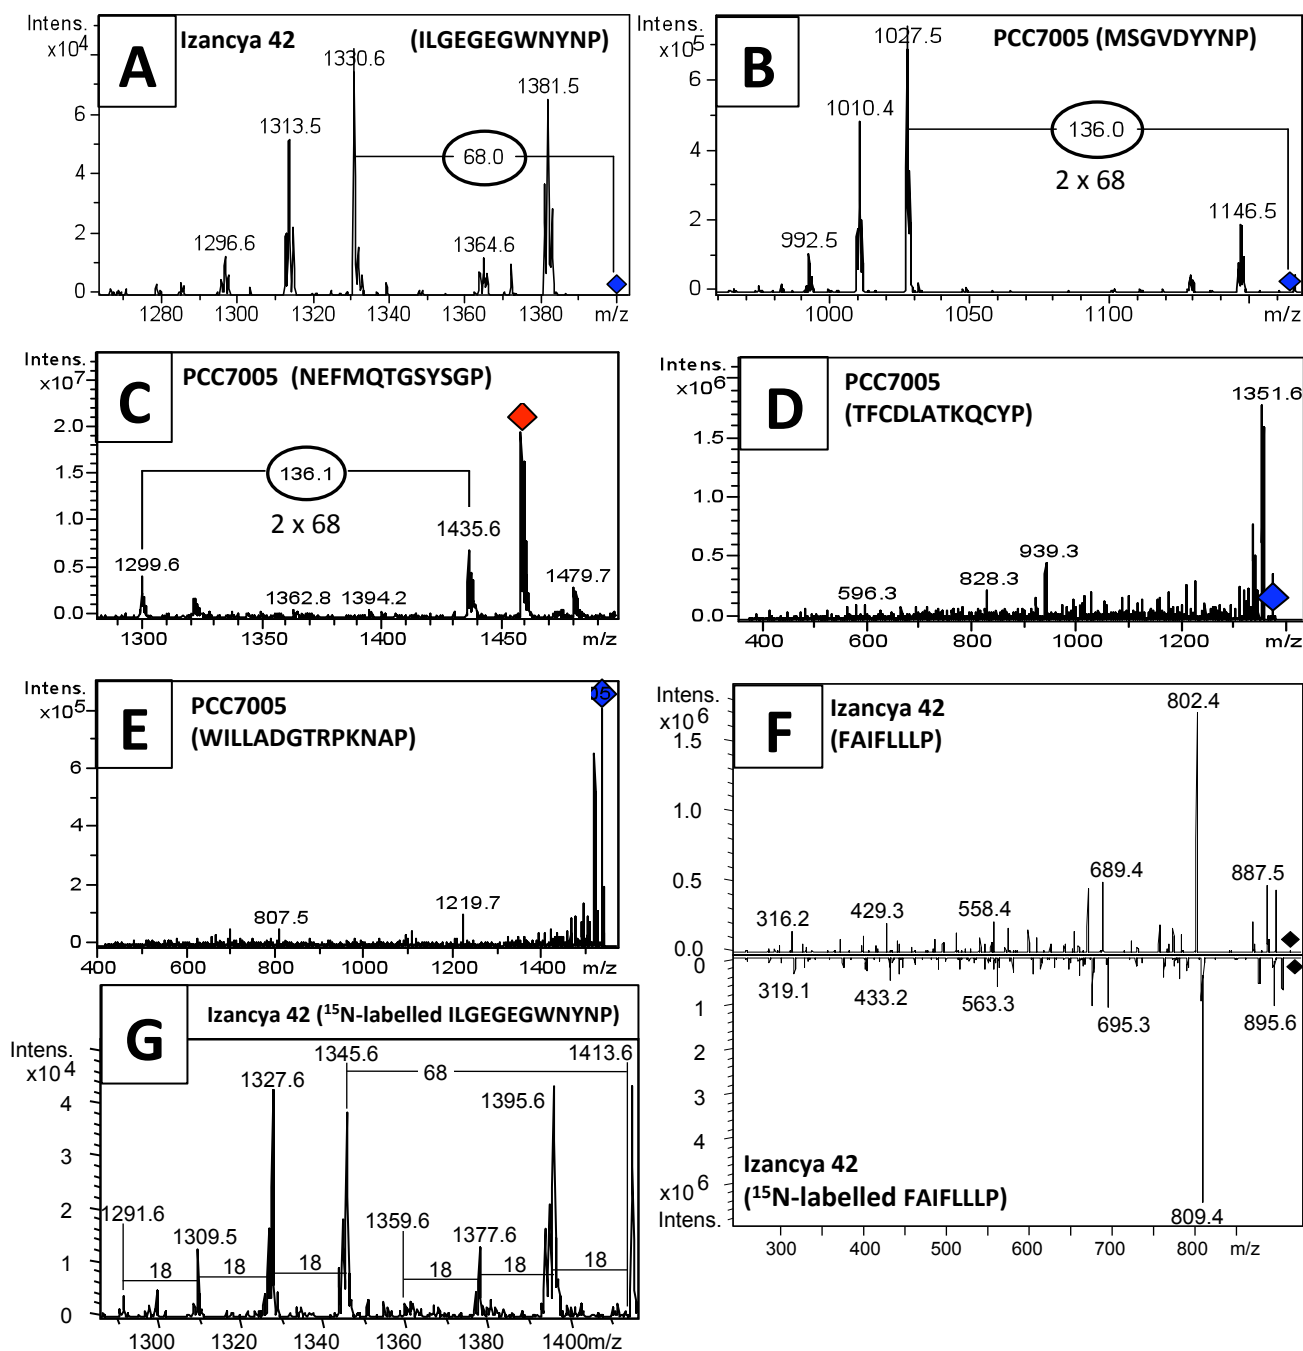

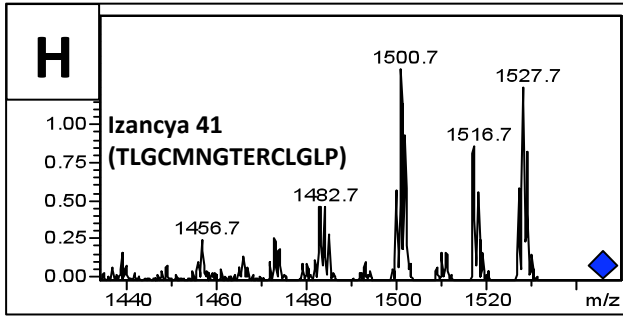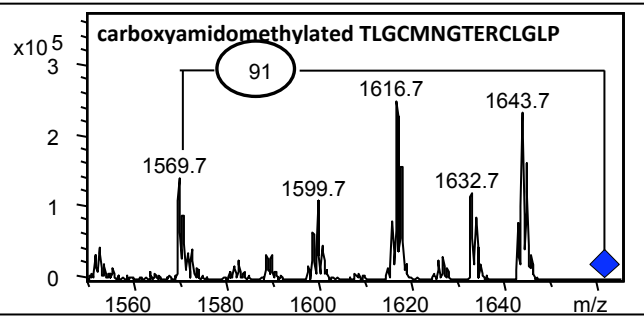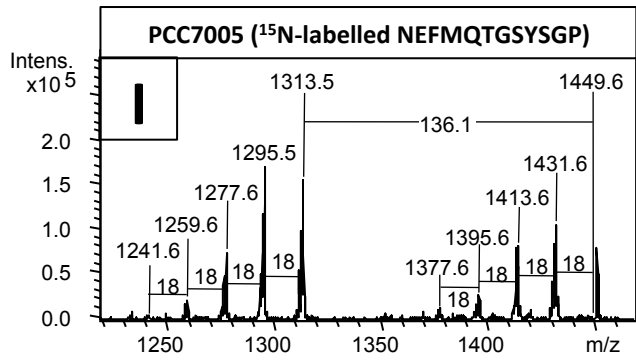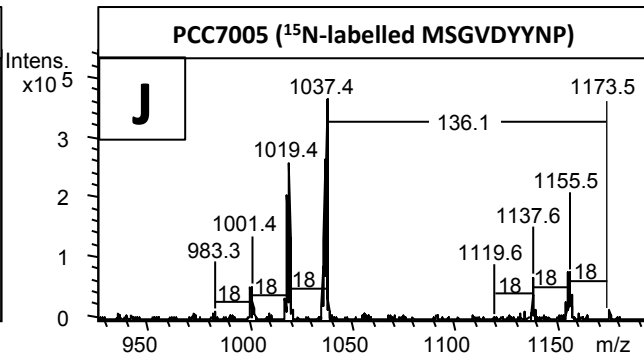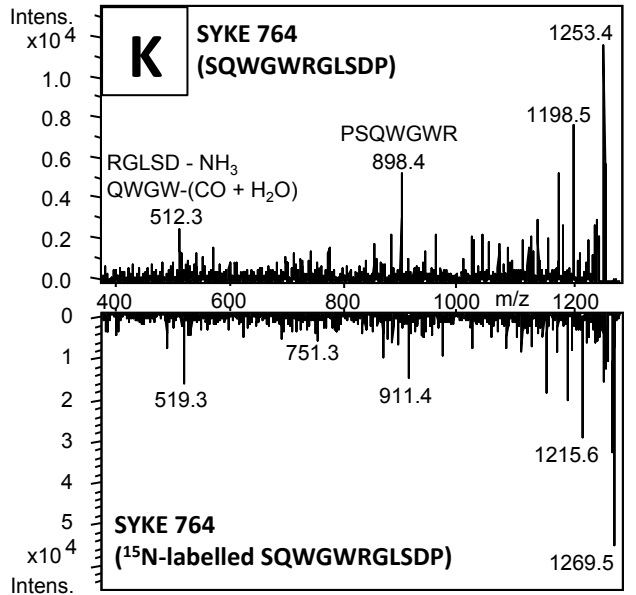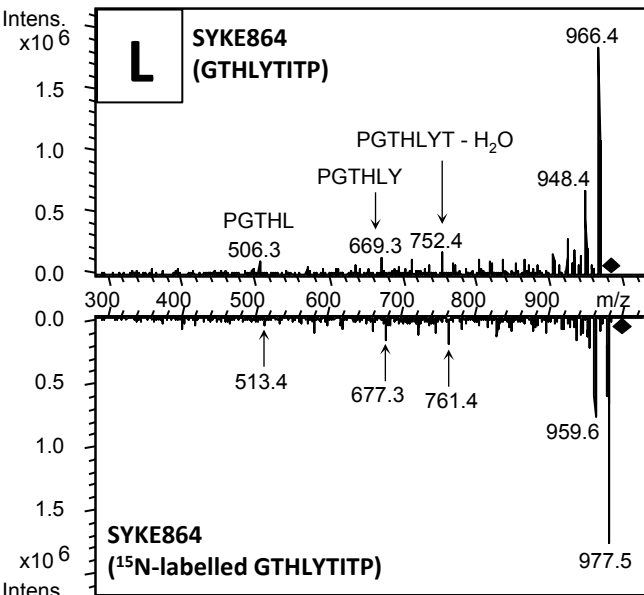

Supplement: pone.0043002.s001.pdf [file pone.0043002.s001.pdf]
