# Supplementary material for: Analysis of an Inactive Cyanobactin Biosynthetic Gene Cluster Leads to Discovery of New Natural Products from Strains of the Genus Microcystis
Source: PubMed Central journal article supplement (PMC3428304; doi:10.1371/journal.pone.0043002), 2012-08-27

**Figure S2.** Product ion mass spectra of prenylated peptide 1068 (A), peptide 1068 (B), <sup>15</sup>N-labelled piricyclamide prenylated peptide 1068 (C), piricyclamide GTHLYTITP (D) and <sup>15</sup>N-labelled piricyclamide GTHLYTITP (E) from *M. aeruginosa* SYKE864.

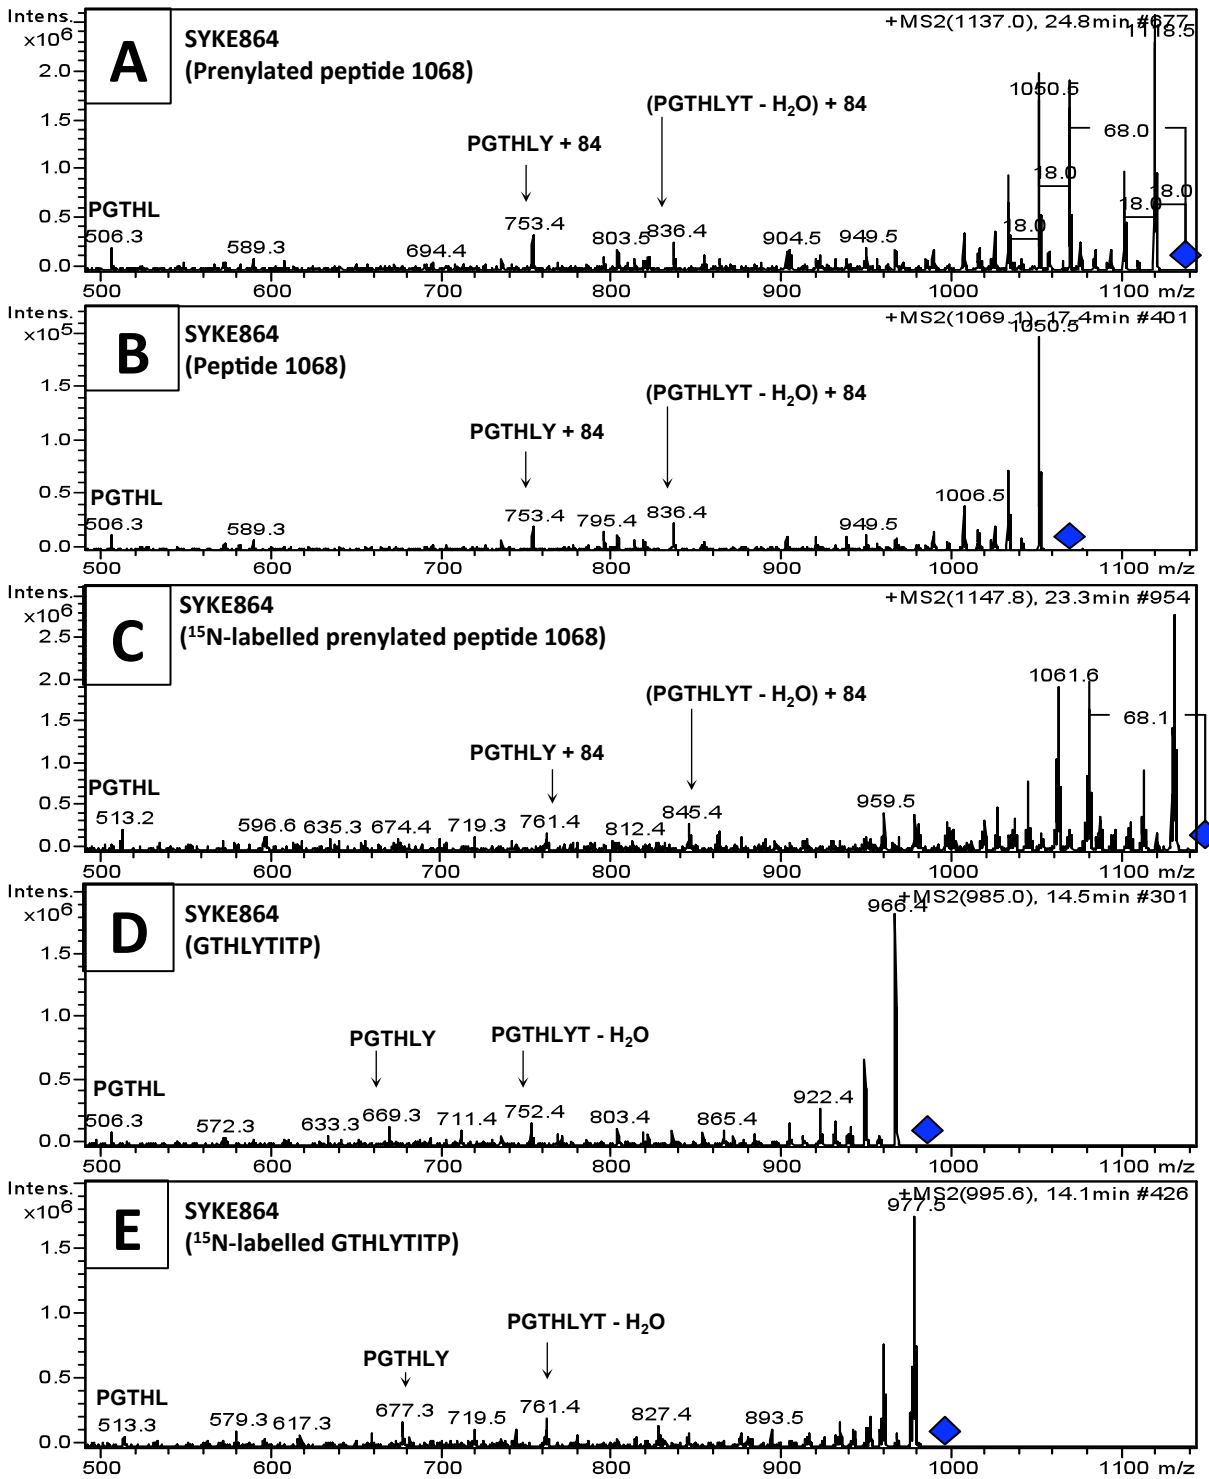

Supplement: pone.0043002.s002.pdf [file pone.0043002.s002.pdf]
