# Supplementary material for: Analysis of an Inactive Cyanobactin Biosynthetic Gene Cluster Leads to Discovery of New Natural Products from Strains of the Genus Microcystis
Source: PubMed Central journal article supplement (PMC3428304; doi:10.1371/journal.pone.0043002), 2012-08-27

**Figure S3.** Ion assignments and intensities of piricyclamide GTHLYTITP, prenylated peptide 1068 and nonprenylated peptide 1068 from *M. aeruginosa* SYKE864. Peptide 1068 is 84 Da larger than piricyclamide GTHLYTITP. In the ion assignments tyrosine, the 84 Da larger amino acid or a tyrosine derivative is indicated as red.

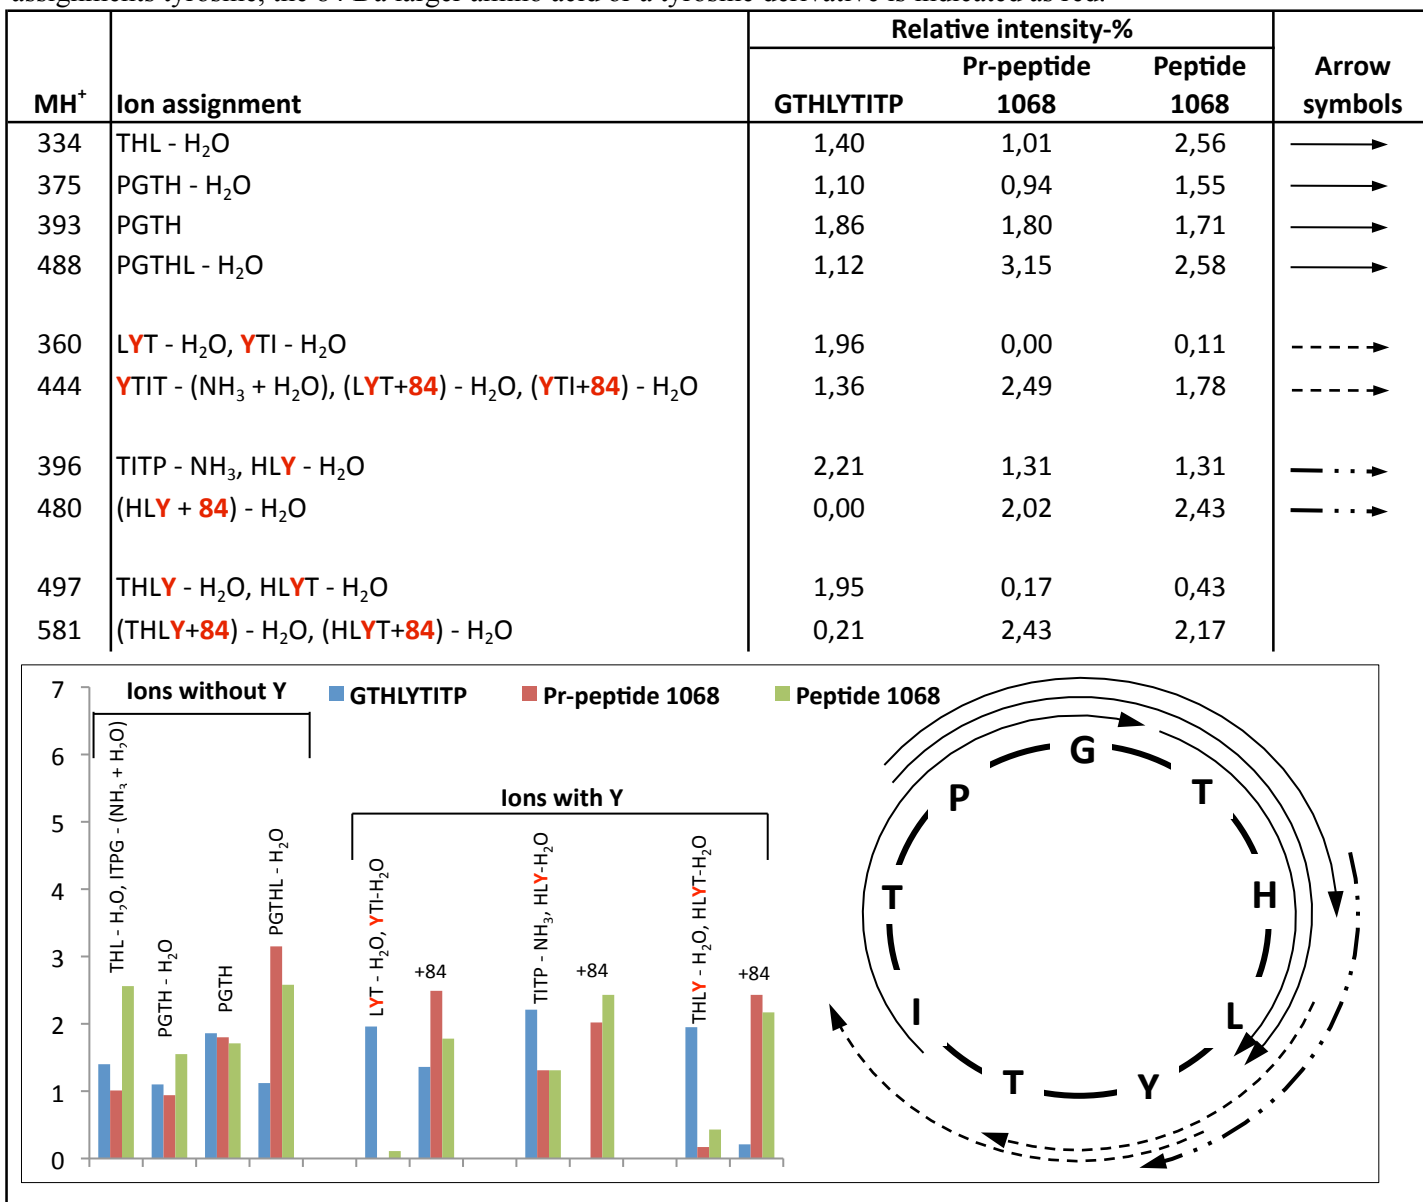

Supplement: pone.0043002.s003.pdf [file pone.0043002.s003.pdf]
