# Supplementary material for: Analysis of an Inactive Cyanobactin Biosynthetic Gene Cluster Leads to Discovery of New Natural Products from Strains of the Genus Microcystis
Source: PubMed Central journal article supplement (PMC3428304; doi:10.1371/journal.pone.0043002), 2012-08-27
Supplement: pone.0043002.s005.pdf [file pone.0043002.s005.pdf]

Table S2. The primers used in this study.

| Primer   | Sequence 5'-3'              |
|----------|-----------------------------|
| kgpF1    | atgaaaacaaaaactgacacccc     |
| kgpR     | gcgggagacgacgcagagtaa       |
| luckyR   | ctatttagaaacagcccaagaacgcac |
| willaF   | ctcaatggattctgttgccg        |
| willaR   | cggccaacagaatccattgag       |
| luckyF   | ccggtatccgaaagccacgaattaac  |
| msgF     | tacaggtctgacaccctccatgt     |
| msgR     | acatggagggtgtcagacctgta     |
| pirF102R | agaggataaatcggctcaacatc     |
| p843F    | cataacaattccgaagagc         |
