# Supplementary material for: Analysis of an Inactive Cyanobactin Biosynthetic Gene Cluster Leads to Discovery of New Natural Products from Strains of the Genus Microcystis
Source: PubMed Central journal article supplement (PMC3428304; doi:10.1371/journal.pone.0043002), 2012-08-27
Supplement: pone.0043002.s006.pdf [file pone.0043002.s006.pdf]

Table S3. The accession numbers of the N- and C-terminal proteases from the cyanobactin gene clusters with known products used in the phylogenetic analysis.

| Strain                              | Accession number              |                               | Cyanobactin                   |
|-------------------------------------|-------------------------------|-------------------------------|-------------------------------|
|                                     | N-terminal protease PirA-like | C-terminal protease PirG-like |                               |
| <i>M. aeruginosa</i> PCC7005        | AFK79993                      | AFK79998                      | Piricyclamide                 |
| <i>T. erythraeum</i> IMS101         | YP_722055                     | YP_722058                     | Trichamide                    |
| <i>Anabaena</i> 90                  | ACK37888                      | ADA00395                      | Anacyclamide                  |
| <i>P. agardhii</i> NIES596          | AED99426                      | AED99446                      | Prenylagaramide               |
| <i>Prochloron</i> (uncultured)      | ACA04487                      | ACA04494                      | Trunkamide, patellin          |
| <i>Prochloron</i> (uncultured)      | AAAY21150                     | AAAY21156                     | Patellamide, ulithiacyclamide |
| <i>Nostoc</i> TAU strain IL-184-6   | ACA04480                      | ACA04486                      | Tenuecyclamide                |
| <i>M. aeruginosa</i> PCC7806        | CAP64335                      | CAP64342                      | Microcyclamide                |
| <i>M. aeruginosa</i> NIES298        | CAO82081                      | CAO82089                      | Microcyclamide                |
| <i>Arthrospira platensis</i> NIES39 | BAI93369                      | BAI93347                      | Arthrospiramide               |
| <i>Lyngbya</i> PCC8106              | ZP_01623699                   | ZP_01623710                   | Lyngbyabactin                 |
