# Supplementary material for: Analysis of an Inactive Cyanobactin Biosynthetic Gene Cluster Leads to Discovery of New Natural Products from Strains of the Genus Microcystis
Source: PubMed Central journal article supplement (PMC3428304; doi:10.1371/journal.pone.0043002), 2012-08-27
Supplement: pone.0043002.s007.pdf [file pone.0043002.s007.pdf]

Table S4. The core sequences of piricyclamides in the *Microcystis* strains studied with calculated monoisotopic mass of corresponding protonated ions and detected variants. Number of nitrogen and sulphur atoms solved from <sup>15</sup>N- and <sup>34</sup>S-labelling experiments is in parenthesis.

|                           |                         | Monoisotopic <i>m/z</i> of [M+H] <sup>+</sup> |            |                  |            |             |      |                 |                 |
|---------------------------|-------------------------|-----------------------------------------------|------------|------------------|------------|-------------|------|-----------------|-----------------|
|                           |                         | Calculated                                    | Detected   |                  |            |             |      |                 |                 |
| <i>Microcystis</i> strain | Core sequence           | Unmodified                                    | Unmodified | Disulfide bridge | Prenylated | Geranylated | MetO | <sup>15</sup> N | <sup>34</sup> S |
| PCC7005                   | MSGVDYYNP               | 1027                                          |            |                  |            |             | 1163 | 1179            | 1173 (10)       |
|                           | NEFMQTGSYSGP            | 1299                                          |            |                  |            |             | 1435 | 1451            | 1449 (14)       |
|                           | TFCDLTKQCYP             | 1371                                          |            | 1369             |            |             |      |                 | 1383 (14)       |
|                           | WILLADGTRPKNAP          | 1533                                          | 1533       |                  |            |             |      |                 | 1553 (20)       |
| Izancya 36, 41            | TLGCMNGTERCLGLP         | 1546                                          |            | 1544             |            |             |      | 1560            | 1563 (19)       |
|                           | DWGTFCVQEDGEGNCKEWEVVP  | 2573                                          |            |                  |            |             |      |                 | 1550 (2)        |
| Izancya 42                | YSNVLPP                 | 771                                           |            |                  |            |             |      |                 |                 |
|                           | FAIFLLLP                | 915                                           | 915        |                  |            |             |      |                 | 923 (8)         |
|                           | ILGEGEGWNYNP            | 1330                                          |            |                  | 1398       |             |      |                 | 1413 (15)       |
| SYKE 764                  | SQWGWRLSDP              | 1270                                          | 1270       |                  |            |             |      |                 | 1287 (17)       |
|                           | ILGEGEGWNYNP            | 1330                                          |            |                  |            |             |      |                 |                 |
|                           | GWGTFCVGEDGDGNCEEWYELP  | 2445                                          |            |                  |            |             |      |                 |                 |
| SYKE 864                  | GTHLYTIP                | 984                                           | 984        |                  |            |             |      |                 | 995 (11)        |
|                           | TFCDLTKQCYP (insert)    | 1371                                          |            |                  |            |             |      |                 |                 |
|                           | DWGTFCVQEDGEGNCKEWEYELP | 2587                                          |            |                  |            |             |      |                 |                 |
|                           | Unknown                 | 1068                                          | 1068       |                  | 1136       |             |      |                 | 1079, 1147 (11) |
| NIES 843                  | APLWDLVRWGAP            | 1362                                          |            |                  |            |             |      |                 |                 |
|                           | TFCDLTKQCYP             | 1371                                          |            |                  |            |             |      |                 |                 |
|                           | DWGTFCVQEDGEGNCKEWEYELP | 2587                                          |            |                  |            |             |      |                 |                 |
