# Supplementary material for: Analysis of an Inactive Cyanobactin Biosynthetic Gene Cluster Leads to Discovery of New Natural Products from Strains of the Genus Microcystis
Source: PubMed Central journal article supplement (PMC3428304; doi:10.1371/journal.pone.0043002), 2012-08-27
Supplement: pone.0043002.s008.pdf [file pone.0043002.s008.pdf]

Table S5. Most common fragment ions of the piricyclamide FAIFLLLP

| Peptide and fragment sequences | Ions (m/z)      |                      |                                           |
|--------------------------------|-----------------|----------------------|-------------------------------------------|
|                                | +H <sup>+</sup> | +H <sup>+</sup> - CO | +H <sup>+</sup> - (CO + NH <sub>3</sub> ) |
| F A I F L L L P                | <b>915</b>      | <b>887</b>           | <b>870</b>                                |
| A I F L L L P                  | <b>768</b>      | 740                  | <b>723</b>                                |
| I F L L L P                    |                 |                      | 652                                       |
| F L L L P                      | <b>584</b>      | 556                  | 539                                       |
| L L L P                        |                 | 409                  | 392                                       |
| L L P                          | 324             | 296                  |                                           |
| I F L L L P F                  | <b>844</b>      | 816                  | 799                                       |
| F L L L P F                    | <b>731</b>      | 703                  | 686                                       |
| L L L P F                      | <b>584</b>      | 556                  | 539                                       |
| L L P F                        | 471             | 443                  | <b>426</b>                                |
| L P F                          | <b>358</b>      | 330                  | 313                                       |
| F L L L P F A                  | <b>802</b>      | <b>774</b>           | <b>757</b>                                |
| L L L P F A                    | <b>655</b>      | <b>627</b>           | <b>610</b>                                |
| L L P F A                      | <b>542</b>      | <b>514</b>           | <b>497</b>                                |
| L P F A                        | <b>429</b>      | <b>401</b>           | 384                                       |
| P F A                          | <b>316</b>      | 288                  |                                           |
| L L L P F A I                  | <b>768</b>      | 740                  | <b>723</b>                                |
| L L P F A I                    | <b>655</b>      | <b>627</b>           | <b>610</b>                                |
| L P F A I                      | <b>542</b>      | <b>514</b>           | <b>497</b>                                |
| P F A I                        | <b>429</b>      | <b>401</b>           | 384                                       |
| F A I                          | <b>332</b>      |                      | <b>287</b>                                |
| L L P F A I F                  | <b>802</b>      | <b>774</b>           | <b>757</b>                                |
| L P F A I F                    | <b>689</b>      | <b>661</b>           | <b>644</b>                                |
| P F A I F                      | <b>576</b>      | <b>548</b>           | <b>531</b>                                |
| F A I F                        | 479             | 451                  | <b>434</b>                                |
| A I F                          | <b>332</b>      |                      | <b>287</b>                                |
| I F                            | <b>261</b>      |                      |                                           |
| L P F A I F L                  | <b>802</b>      | <b>774</b>           | <b>757</b>                                |
| P F A I F L                    | <b>689</b>      | <b>661</b>           | <b>644</b>                                |
| F A I F L                      | 592             |                      | <b>547</b>                                |
| A I F L                        | <b>445</b>      | <b>417</b>           | <b>400</b>                                |
| I F L                          | <b>374</b>      |                      | <b>329</b>                                |
| F L                            | <b>261</b>      |                      |                                           |
| P F A I F L L                  | <b>802</b>      | <b>774</b>           | <b>757</b>                                |
| F A I F L L                    | 705             |                      | <b>660</b>                                |
| A I F L L                      | <b>558</b>      | <b>530</b>           | <b>513</b>                                |
| I F L L                        | <b>487</b>      | <b>459</b>           | <b>442</b>                                |
| F L L                          | <b>374</b>      |                      | <b>329</b>                                |
| F A I F L L L                  | <b>818</b>      | 790                  | <b>773</b>                                |
| A I F L L L                    | <b>671</b>      | <b>643</b>           | <b>626</b>                                |
| I F L L L                      | <b>600</b>      | 572                  | <b>555</b>                                |
| F L L L                        | <b>487</b>      | <b>459</b>           | <b>442</b>                                |
| L L L                          | 340             |                      | <b>295</b>                                |

Dipeptide LP, PF, FA, AI and LL ions were unstable in ion trap  
Ions with relative intensity over 1% are in boldface
